# Supplementary material for: SnO–Sn3O4 heterostructural gas sensor with high response and selectivity to parts-per-billion-level NO2 at low operating temperature
Source: Royal Society of Chemistry journal article supplement (doi:10.1039/d0ra05576j), 2020-01-01
Supplement: d0ra05576j1.pdf [file d0ra05576j1.pdf]

## Supporting Information

SnO-Sn<sub>3</sub>O<sub>4</sub> heterostructural gas sensor with high response and selectivity to parts-per-billion-level NO<sub>2</sub> at low operating temperature

Wenwen Zeng<sup>a</sup>, Yingzhi Liu<sup>a</sup>, Guoliang Chen<sup>a</sup>, Haoran Zhan<sup>\*a</sup>, Jun Mei<sup>\*a</sup>, Nan Luo<sup>a</sup>,  
Zhoukun He<sup>b</sup>, Changyu Tang<sup>a</sup>

<sup>a</sup> Chengdu Green Energy and Green Manufacturing Technology R&D Center,  
Chengdu Development Center of Science and Technology, China Academy of  
Engineering Physics, Chengdu, 610200, China.

<sup>b</sup> Institute for Advanced Study, Chengdu University, Chengdu, 610106, China

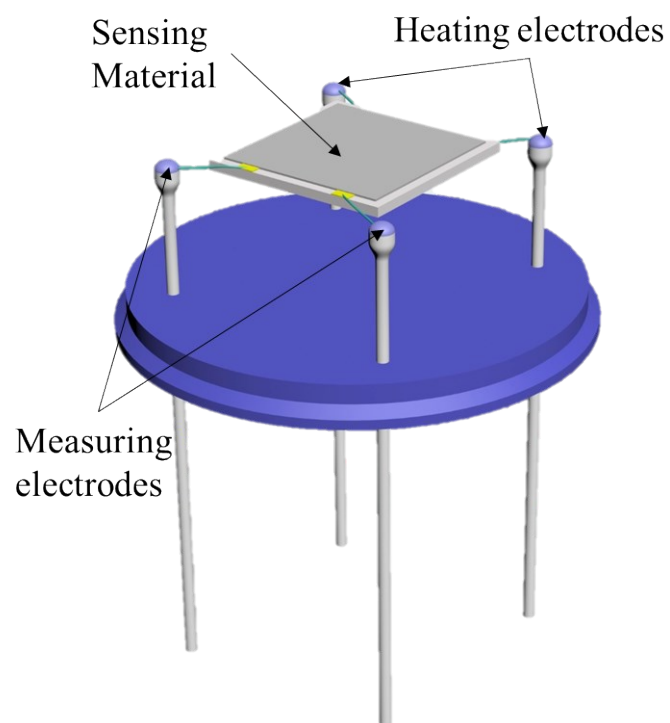

**Figure S1.** Schematic diagram of the gas sensors used in this study.

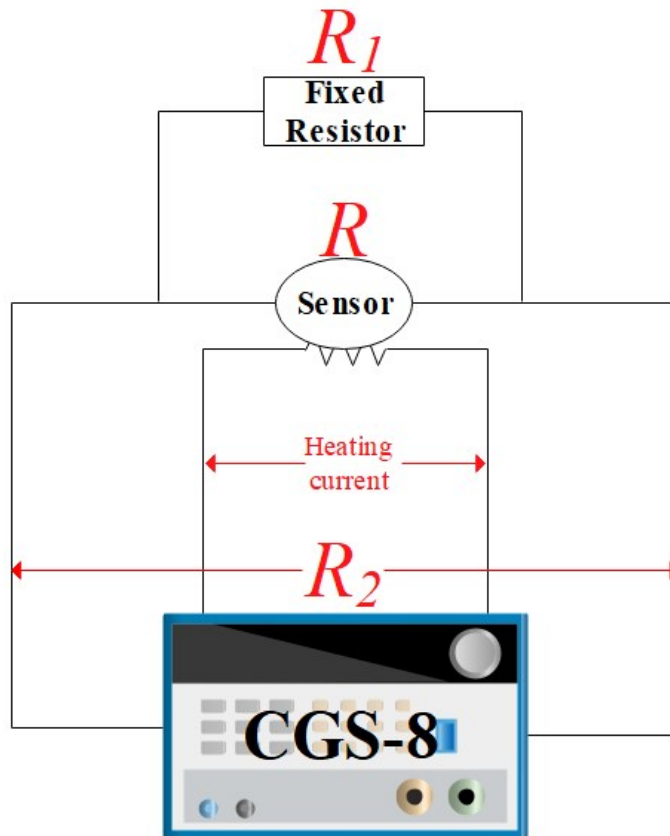

**Figure S2.** Schematic diagram of the measuring circuit used in the tests.

Because of the high resistance of the sensors made by SnO-Sn<sub>3</sub>O<sub>4</sub> heterostructure, their resistances might exceed the measuring range of the test system (500 MΩ) when exposed to high concentrations of NO<sub>2</sub>. Hence the circuit above was used to enlarge the measuring range. In Figure S2,  $R_1$  was the resistance value of a fixed resistor (a resistor with 470MΩ nominal value was used here), which was parallel connected with the gas sensor.  $R$  was the resistance of the gas sensor, which was the value we ultimately need.  $R_2$  was the resistance value measured by CGS-8 intelligent gas sensing analysis system. For these three factors,

$$\frac{1}{R_1} + \frac{1}{R} = \frac{1}{R_2}$$

So,

$$R = \frac{R_1 * R_2}{R_1 - R_2}$$

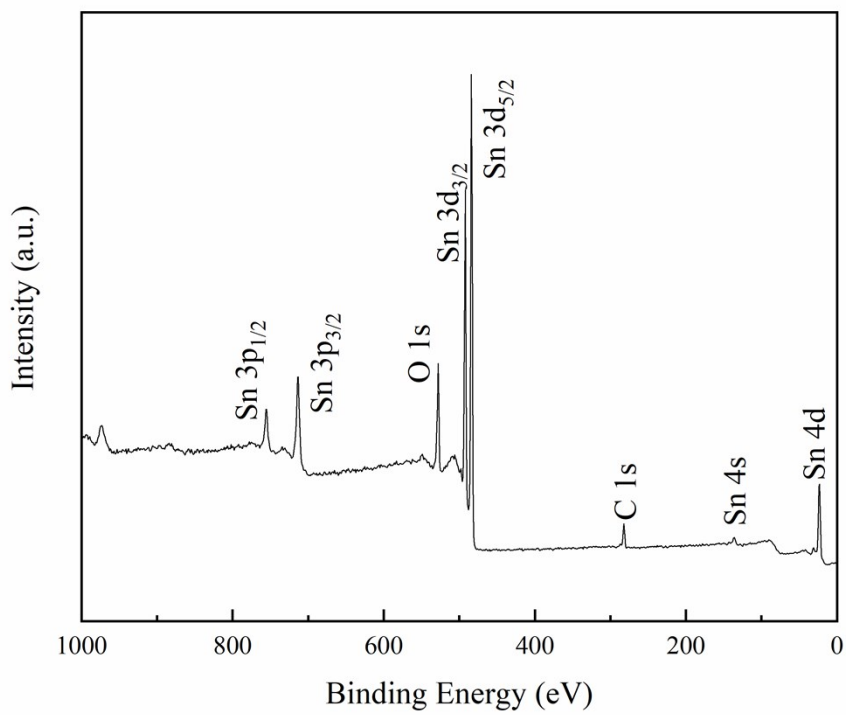

**Figure S3.** General scan X-ray photo electron spectra of as-prepared sample.

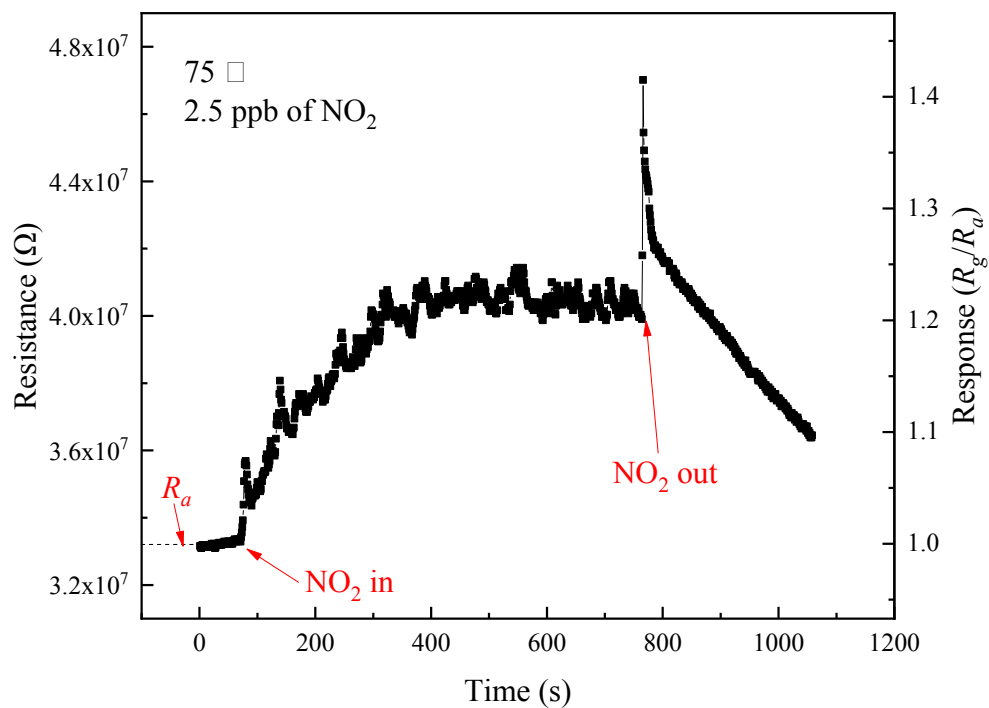

**Figure S4.** Resistance and response curve of SnO-Sn<sub>3</sub>O<sub>4</sub> heterostructure when exposed to 2.5 ppb NO<sub>2</sub> at 75 °C.

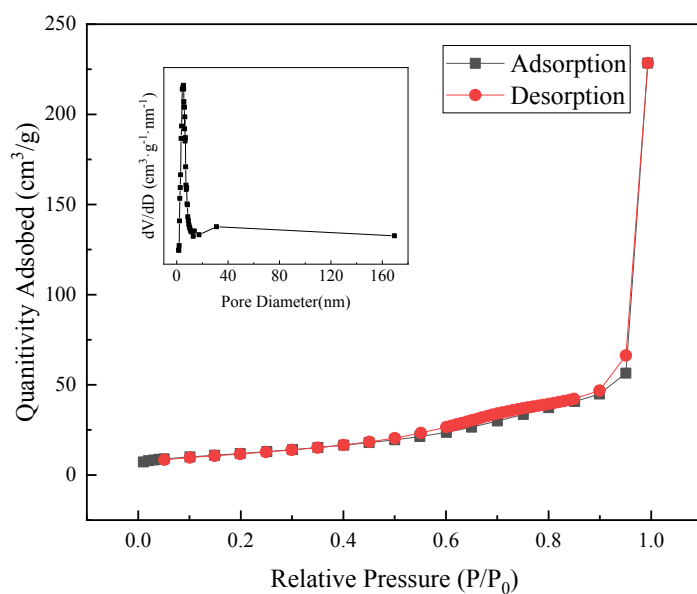

**Figure S5.** N<sub>2</sub> adsorption–desorption isotherm of the SnO–Sn<sub>3</sub>O<sub>4</sub> heterostructure and corresponding pore size distribution.
